# Supplementary figures and images for: Porcine Reproductive and Respiratory Syndrome (PRRS) Epidemiology in an Integrated Pig Company of Northern Italy: A Multilevel Threat Requiring Multilevel Interventions
Source: MDPI journal article supplement (doi:10.3390/v13122510), 2021-12-14

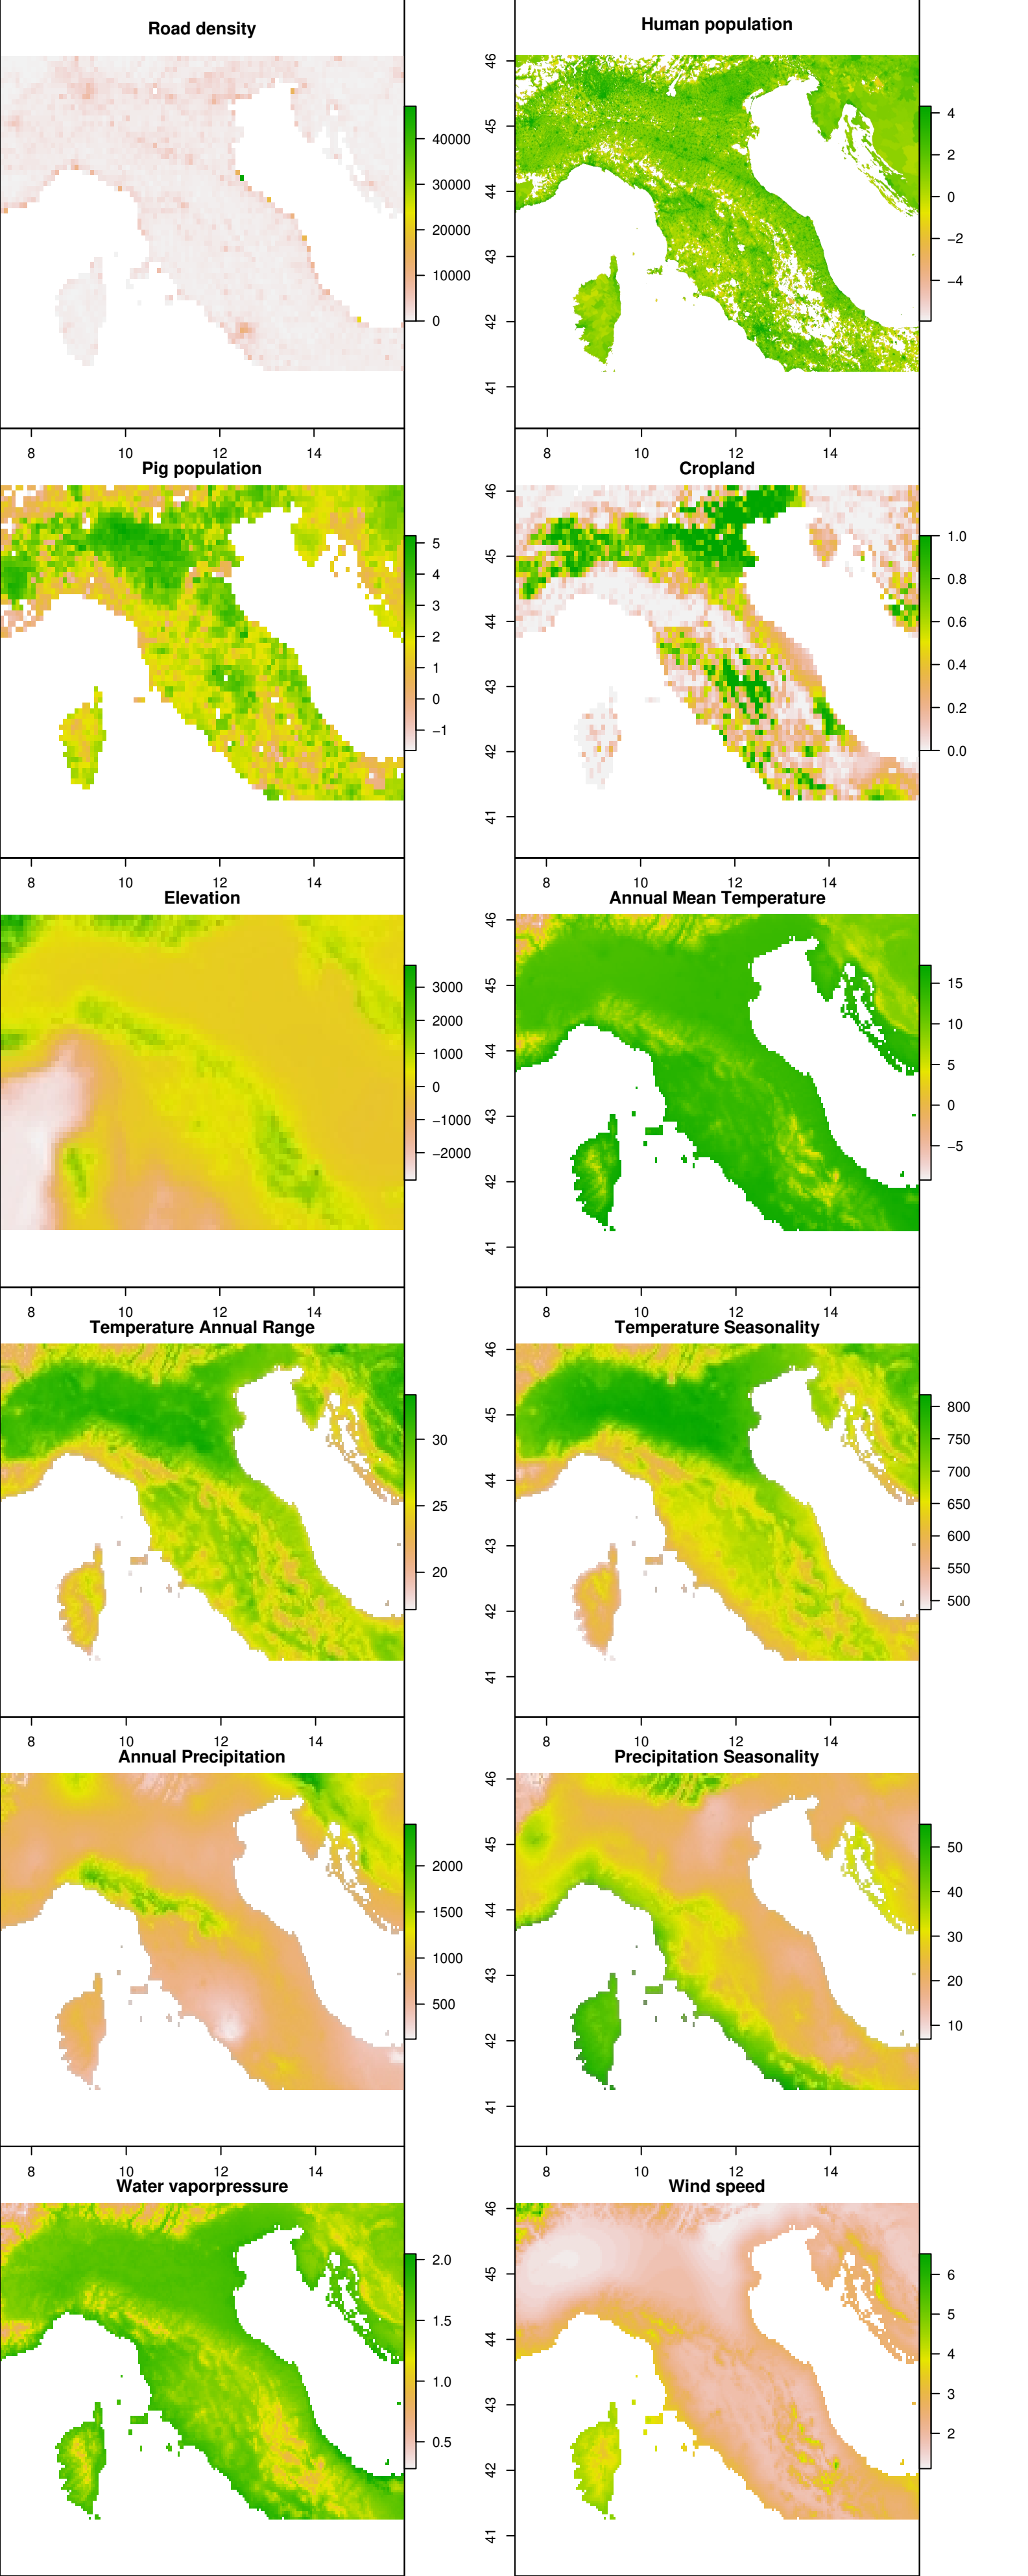

Supplement: s1 [file s1]

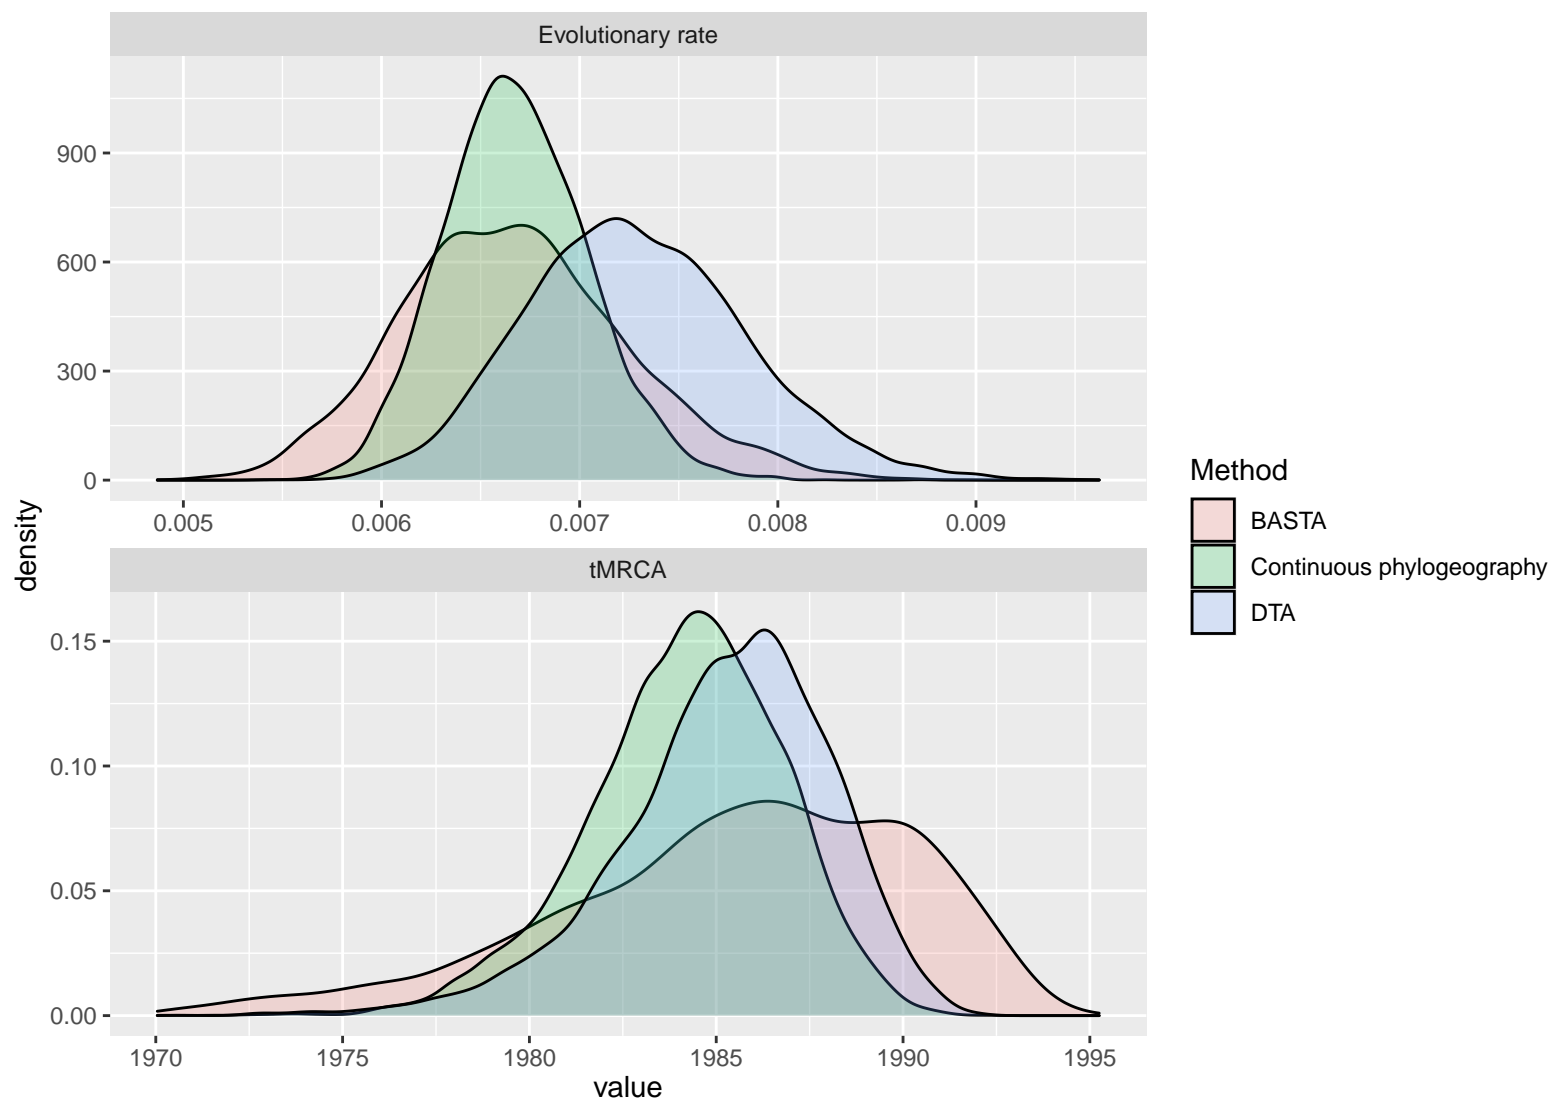

Supplement: s1 [file s1]
